# Supplementary material for: Atypical parathyroid adenomas as a rare cause of primary hyperparathyroidism - in an academic institution experience
Source: Research Square preprint supplement (doi:10.21203/rs.3.rs-1099498/v1), 2021-11-23
Supplement: Supplementary file 1 [file 98b1a7c269fe6b3cc4fcd64c.docx]

The authors did not receive support from any organization for the submitted work.

No funding was received to assist with the preparation of this manuscript.

No funding was received for conducting this study.

No funds, grants, or other support was received.

The authors have no relevant financial or non-financial interests to disclose.

The authors have no conflicts of interest to declare that are relevant to the content of this article.

All authors certify that they have no affiliations with or involvement in any organization or entity with any financial interest or non-financial interest in the subject matter or materials discussed in this manuscript.

The authors have no financial or proprietary interests in any material discussed in this article.
